# Supplementary material
Source: MDPI journal article supplement (https://www.mdpi.com/2673-8007/3/1/19)
Supplement: s1 [file s1]

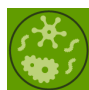

# Supplementary Materials:

4 (Shannon H)

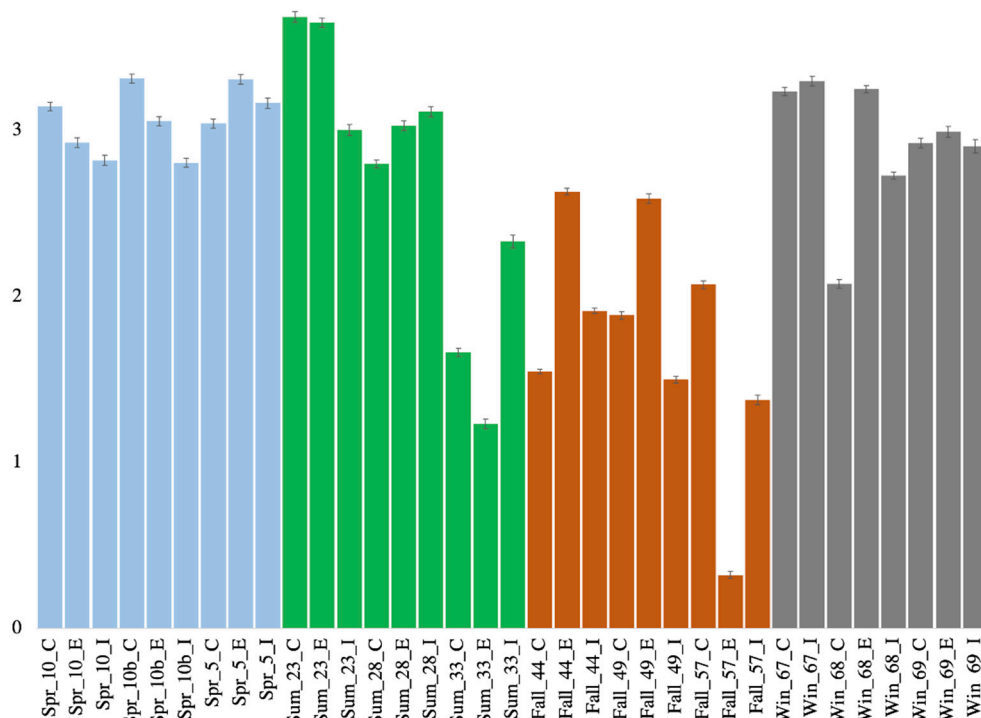

**Figure S1.** Bacterial Shannon diversity indices for all gut microbiome sections and seasons. S, stomach; C, cecum; I, intestine; Spr, spring; Sum, summer; Win, winter.

**Table S1.** Wilcoxon and Kruskal-Wallis test comparisons between Shannon diversity indices, computed in R.

| Comparison        | p-value     |
|-------------------|-------------|
| Fall-Spring       | 0.001397486 |
| Fall-Summer       | 0.039951967 |
| Spring-Summer     | 0.808642914 |
| Fall-Winter       | 0.016705635 |
| Spring-Winter     | 1.000000000 |
| Summer-Winter     | 0.663453369 |
| Cecum-Stomach     | 0.7945872   |
| Cecum-Intestine   | 1.0000000   |
| Stomach-Intestine | 1.0000000   |
| Male-Female       | 0.8812      |

**Table S2.** Analysis of molecular variance (amova) testing significance of clusters C1, C2, C3 and C4 observed in the PCoA plot.

| C1-C2-C3-C4                  | Among   | Within   | Total   |
|------------------------------|---------|----------|---------|
| SS                           | 5.18423 | 8.14293  | 13.3272 |
| dF                           | 3       | 31       | 34      |
| MS                           | 1.72808 | 0.262675 |         |
| Fs: 6.57876, p-value: <0.001 |         |          |         |
| C1-C3                        | Among   | Within   | Total   |

|                                       |              |               |              |
|---------------------------------------|--------------|---------------|--------------|
| SS                                    | 2.80539      | 4.71236       | 7.51776      |
| dF                                    | 1            | 20            | 21           |
| MS                                    | 2.80539      | 0.235618      |              |
| Fs: 11.9065, <i>p</i> -value: <0.001  |              |               |              |
| <b>C1-C4</b>                          | <b>Among</b> | <b>Within</b> | <b>Total</b> |
| SS                                    | 1.45837      | 4.24808       | 5.70646      |
| dF                                    | 1            | 13            | 14           |
| MS                                    | 1.45837      | 0.326776      |              |
| Fs: 4.46291, <i>p</i> -value: 0.001   |              |               |              |
| <b>C1-C2</b>                          | <b>Among</b> | <b>Within</b> | <b>Total</b> |
| SS                                    | 1.44708      | 4.47224       | 5.91932      |
| dF                                    | 1            | 14            | 15           |
| MS                                    | 1.44708      | 0.319446      |              |
| Fs: 4.52998, <i>p</i> -value: < 0.001 |              |               |              |
| SS                                    | 1.03306      | 3.67069       | 4.70376      |
| <b>C3-C4</b>                          | <b>Among</b> | <b>Within</b> | <b>Total</b> |
| dF                                    | 1            | 17            | 18           |
| MS                                    | 1.03306      | 0.215923      |              |
| Fs: 4.78441, <i>p</i> -value: < 0.001 |              |               |              |
| <b>C2-C3</b>                          | <b>Among</b> | <b>Within</b> | <b>Total</b> |
| SS                                    | 2.09949      | 3.89485       | 5.99433      |
| dF                                    | 1            | 18            | 19           |
| MS                                    | 2.09949      | 0.21638       |              |
| Fs: 9.70276, <i>p</i> -value: < 0.001 |              |               |              |
| <b>C2-C4</b>                          | <b>Among</b> | <b>Within</b> | <b>Total</b> |
| SS                                    | 1.00634      | 3.43057       | 4.43691      |
| dF                                    | 1            | 11            | 12           |
| MS                                    | 1.00634      | 0.31187       |              |
| Fs: 3.22681, <i>p</i> -value: 0.004   |              |               |              |

**Table S3.** Homogeneity of molecular variance (homova) testing significance of variance between clusters C1, C2, C3 and C4 observed in the PCoA plot.

|                    | BValue     | P-value | SSwithin/(Ni-1) values                 |
|--------------------|------------|---------|----------------------------------------|
| <b>C1-C2-C3-C4</b> | 1.25997    | 0.001   | 0.33061 - 0.17229 - 0.320641 - 0.30456 |
| <b>C1-C2</b>       | 0.0107119  | 0.572   | 0.33061 - 0.30456                      |
| <b>C1-C3</b>       | 0.994095   | <0.001  | 0.33061 - 0.17229                      |
| <b>C1-C4</b>       | 0.00132864 | 0.84    | 0.33061 - 0.320641                     |
| <b>C3-C4</b>       | 0.680924   | 0.027   | 0.17229 - 0.320641                     |
| <b>C3-C2</b>       | 0.641697   | 0.02    | 0.17229 - 0.30456                      |
| <b>C2-C4</b>       | 0.00331122 | 0.631   | 0.320641 - 0.30456                     |

**Table S4.** List of the shared taxa between samples from all 4 seasons, and list of unique taxa found within samples from each season. Taxa are presented in decreasing relative abundance in the samples.

| Shared taxa between samples from all four seasons                                                          |
|------------------------------------------------------------------------------------------------------------|
| Stenotrophomonas; Xanthomonadaceae; Xanthomonadales; Gammaproteobacteria; Proteobacteria                   |
| Macrococcus; Staphylococcaceae; Staphylococcales; Bacilli; Firmicutes                                      |
| Pseudomonas; Pseudomonadaceae; Pseudomonadales; Gammaproteobacteria; Proteobacteria                        |
| Clostridiaceae_unclassified; Clostridiaceae; Clostridiales; Clostridia; Firmicutes                         |
| Enterobacteriaceae_unclassified; Enterobacteriaceae; Enterobacterales; Gammaproteobacteria; Proteobacteria |
| Lelliottia; Enterobacteriaceae; Enterobacterales; Gammaproteobacteria; Proteobacteria                      |

|                                                                                                                                           |
|-------------------------------------------------------------------------------------------------------------------------------------------|
| Acinetobacter; Moraxellaceae; Pseudomonadales; Gammaproteobacteria; Proteobacteria                                                        |
| Staphylococcus; Staphylococcaceae; Staphylococcales; Bacilli; Firmicutes                                                                  |
| Delftia; Comamonadaceae; Burkholderiales; Gammaproteobacteria; Proteobacteria                                                             |
| Brevundimonas; Caulobacteraceae; Caulobacterales; Alphaproteobacteria; Proteobacteria                                                     |
| Mycoplasma; Mycoplasmataceae; Mycoplasmatales; Bacilli; Firmicutes                                                                        |
| Clostridium_sensu_stricto_1; Clostridiaceae; Clostridiales; Clostridia; Firmicutes                                                        |
| Corynebacterium; Corynebacteriaceae; Corynebacteriales; Actinobacteria; Actinobacteriota                                                  |
| Bacteria_unclassified; Bacteria_unclassified; Bacteria_unclassified; Bacteria_unclassified; Bacteria_unclassified                         |
| Allorhizobium-Neorhizobium-Pararhizobium-Rhizobium; Rhizobiaceae; Rhizobiales; Alphaproteobacteria; Proteobacteria                        |
| Streptococcus; Streptococcaceae; Lactobacillales; Bacilli; Firmicutes                                                                     |
| Flavobacterium; Flavobacteriaceae; Flavobacteriales; Bacteroidia; Bacteroidota                                                            |
| Enterobacterales_unclassified; Enterobacterales_unclassified; Enterobacterales; Gammaproteobacteria; Proteobacteria                       |
| Sphingomonas; Sphingomonadaceae; Sphingomonadales; Alphaproteobacteria; Proteobacteria                                                    |
| Rhodococcus; Nocardiaceae; Corynebacteriales; Actinobacteria; Actinobacteriota                                                            |
| Methylobacterium-Methylorubrum; Beijerinckiaceae; Rhizobiales; Alphaproteobacteria; Proteobacteria                                        |
| Anaerococcus; Peptostreptococcales-Tissierellales_fa; Peptostreptococcales-Tissierellales; Clostridia; Firmicutes                         |
| Roseomonas; Acetobacteraceae; Acetobacterales; Alphaproteobacteria; Proteobacteria                                                        |
| Enhydrobacter; Moraxellaceae; Pseudomonadales; Gammaproteobacteria; Proteobacteria                                                        |
| Gammaproteobacteria_unclassified; Gammaproteobacteria_unclassified; Gammaproteobacteria_unclassified; Gammaproteobacteria; Proteobacteria |
| Lactobacillus; Lactobacillaceae; Lactobacillales; Bacilli; Firmicutes                                                                     |
| Sphingomonadaceae_unclassified; Sphingomonadaceae; Sphingomonadales; Alphaproteobacteria; Proteobacteria                                  |
| Xanthomonadaceae_unclassified; Xanthomonadaceae; Xanthomonadales; Gammaproteobacteria; Proteobacteria                                     |
| Nocardioides; Nocardiodaceae; Propionibacteriales; Actinobacteria; Actinobacteriota                                                       |
| Micrococcaceae_unclassified; Micrococcaceae; Micrococcales; Actinobacteria; Actinobacteriota                                              |
| Cutibacterium; Propionibacteriaceae; Propionibacteriales; Actinobacteria; Actinobacteriota                                                |
| Pseudarthrobacter; Micrococcaceae; Micrococcales; Actinobacteria; Actinobacteriota                                                        |
| Pseudomonadaceae_unclassified; Pseudomonadaceae; Pseudomonadales; Gammaproteobacteria; Proteobacteria                                     |
| Comamonadaceae_unclassified; Comamonadaceae; Burkholderiales; Gammaproteobacteria; Proteobacteria                                         |
| Rhizobiaceae_unclassified; Rhizobiaceae; Rhizobiales; Alphaproteobacteria; Proteobacteria                                                 |
| Bacilli_unclassified; Bacilli_unclassified; Bacilli_unclassified; Bacilli; Firmicutes                                                     |
| Oxalobacteraceae_unclassified; Oxalobacteraceae; Burkholderiales; Gammaproteobacteria; Proteobacteria                                     |
| Xanthomonadales_unclassified; Xanthomonadales_unclassified; Xanthomonadales; Gammaproteobacteria; Proteobacteria                          |
| Burkholderiales_unclassified; Burkholderiales_unclassified; Burkholderiales; Gammaproteobacteria; Proteobacteria                          |
| Moraxellaceae_unclassified; Moraxellaceae; Pseudomonadales; Gammaproteobacteria; Proteobacteria                                           |
| Novosphingobium; Sphingomonadaceae; Sphingomonadales; Alphaproteobacteria; Proteobacteria                                                 |
| Caulobacteraceae_unclassified; Caulobacteraceae; Caulobacterales; Alphaproteobacteria; Proteobacteria                                     |
| Dechloromonas; Rhodocyclaceae; Burkholderiales; Gammaproteobacteria; Proteobacteria                                                       |
| Enterobacter; Enterobacteriaceae; Enterobacteriales; Gammaproteobacteria; Proteobacteria                                                  |
| <b>Unique taxa in the spring samples</b>                                                                                                  |
| Microvirga; Beijerinckiaceae; Rhizobiales; Alphaproteobacteria; Proteobacteria                                                            |
| Polyangiales_unclassified; Polyangiales_unclassified; Polyangiales; Polyangia; Myxococcota                                                |
| Phenylobacterium; Caulobacteraceae; Caulobacterales; Alphaproteobacteria; Proteobacteria                                                  |
| Brevibacterium; Brevibacteriaceae; Micrococcales; Actinobacteria; Actinobacteriota                                                        |
| Capnocytophaga; Flavobacteriaceae; Flavobacteriales; Bacteroidia; Bacteroidota                                                            |
| Isoptricola; Promicromonosporaceae; Micrococcales; Actinobacteria; Actinobacteriota                                                       |
| Turicella; Corynebacteriaceae; Corynebacteriales; Actinobacteria; Actinobacteriota                                                        |
| Peptoniphilus; Peptostreptococcales-Tissierellales_fa; Peptostreptococcales-Tissierellales; Clostridia; Firmicutes                        |

|                                                                                                                |
|----------------------------------------------------------------------------------------------------------------|
| Aggregatibacter; Pasteurellaceae; Pasteurellales; Gammaproteobacteria; Proteobacteria                          |
| Candidatus_Rhabdochlamydia; Simkaniaceae; Chlamydiales; Chlamydiae; Verrucomicrobiota                          |
| Gaiella; Gaiellaceae; Gaiellales; Thermoleophilia; Actinobacteriota                                            |
| Niveispirillum; Azospirillaceae; Azospirillales; Alphaproteobacteria; Proteobacteria                           |
| Chryseolinea; Microscillaceae; Cytophagales; Bacteroidia; Bacteroidota                                         |
| Iamia; Iamiaceae; Microtrichales; Acidimicrobiia; Actinobacteriota                                             |
| Thermoactinomyces; Thermoactinomycetaceae; Thermoactinomycetales; Bacilli; Firmicutes                          |
| Xanthobacter; Xanthobacteraceae; Rhizobiales; Alphaproteobacteria; Proteobacteria                              |
| Tepidimonas; Comamonadaceae; Burkholderiales; Gammaproteobacteria; Proteobacteria                              |
| Atopobium; Atopobiaceae; Coriobacteriales; Coriobacteriia; Actinobacteriota                                    |
| uncultured_ge; uncultured_fa; uncultured; Acidimicrobiia; Actinobacteriota                                     |
| Conexibacter; Solirubrobacteraceae; Solirubrobacterales; Thermoleophilia; Actinobacteriota                     |
| Vermiphilaceae_ge; Vermiphilaceae; Babeliales; Babeliae; Dependientiae                                         |
| Thermoactinomycetaceae_unclassified; Thermoactinomycetaceae; Thermoactinomycetales; Bacilli; Firmicutes        |
| uncultured; Hungateiclostridiaceae; Clostridia_or; Clostridia; Firmicutes                                      |
| Hyphomicrobiaceae_unclassified; Hyphomicrobiaceae; Rhizobiales; Alphaproteobacteria; Proteobacteria            |
| Cereibacter; Rhodobacteraceae; Rhodobacterales; Alphaproteobacteria; Proteobacteria                            |
| Cupriavidus; Burkholderiaceae; Burkholderiales; Gammaproteobacteria; Proteobacteria                            |
| Rickettsiella; Diplorickettsiaceae; Diplorickettsiales; Gammaproteobacteria; Proteobacteria                    |
| uncultured; Diplorickettsiaceae; Diplorickettsiales; Gammaproteobacteria; Proteobacteria                       |
| Pectobacteriaceae_unclassified; Pectobacteriaceae; Enterobacterales; Gammaproteobacteria; Proteobacteria       |
| Unique taxa in the summer samples                                                                              |
| Yersinia; Yersiniaceae; Enterobacterales; Gammaproteobacteria; Proteobacteria                                  |
| Bacteroidales_unclassified; Bacteroidales_unclassified; Bacteroidales; Bacteroidia; Bacteroidota               |
| Leucobacter; Microbacteriaceae; Micrococcales; Actinobacteria; Actinobacteriota                                |
| Ruminococcaceae_unclassified; Ruminococcaceae; Oscillospirales; Clostridia; Firmicutes                         |
| Neisseriaceae_unclassified; Neisseriaceae; Burkholderiales; Gammaproteobacteria; Proteobacteria                |
| Vagococcus; Vagococcaceae; Lactobacillales; Bacilli; Firmicutes                                                |
| uncultured; Ruminococcaceae; Oscillospirales; Clostridia; Firmicutes                                           |
| uncultured; Rhizobiales_Incertae_Sedis; Rhizobiales; Alphaproteobacteria; Proteobacteria                       |
| Dietzia; Dietziaceae; Corynebacteriales; Actinobacteria; Actinobacteriota                                      |
| Kurthia; Planococcaceae; Bacillales; Bacilli; Firmicutes                                                       |
| Gemella; Gemellaceae; Staphylococcales; Bacilli; Firmicutes                                                    |
| Hyphomicrobium; Hyphomicrobiaceae; Rhizobiales; Alphaproteobacteria; Proteobacteria                            |
| Mesorhizobium; Rhizobiaceae; Rhizobiales; Alphaproteobacteria; Proteobacteria                                  |
| Gallicola; Peptostreptococcales-Tissierellales_fa; Peptostreptococcales-Tissierellales; Clostridia; Firmicutes |
| Saccharopolyspora; Pseudonocardaceae; Pseudonocardiales; Actinobacteria; Actinobacteriota                      |
| Longimicrobium; Longimicrobiaceae; Longimicrobiales; Longimicrobia; Gemmatimonadota                            |
| Plesiomonas; Enterobacteriaceae; Enterobacterales; Gammaproteobacteria; Proteobacteria                         |
| Dermacoccus; Dermacoccaceae; Micrococcales; Actinobacteria; Actinobacteriota                                   |
| Ruminococcus; Ruminococcaceae; Oscillospirales; Clostridia; Firmicutes                                         |
| Pannonibacter; Stappiaceae; Rhizobiales; Alphaproteobacteria; Proteobacteria                                   |
| uncultured; Desulfovibrionaceae; Desulfovibrionales; Desulfovibrionia; Desulfobacterota                        |
| Anaerostipes; Lachnospiraceae; Lachnospirales; Clostridia; Firmicutes                                          |
| Larkinella; Spirosomaceae; Cytophagales; Bacteroidia; Bacteroidota                                             |
| Lactococcus; Streptococcaceae; Lactobacillales; Bacilli; Firmicutes                                            |
| Rubellimicrobium; Rhodobacteraceae; Rhodobacterales; Alphaproteobacteria; Proteobacteria                       |
| Clostridium_sensu_stricto_13; Clostridiaceae; Clostridiales; Clostridia; Firmicutes                            |
| Marmoricola; Nocardiodaceae; Propionibacteriales; Actinobacteria; Actinobacteriota                             |
| Blastococcus; Geodermatophilaceae; Frankiales; Actinobacteria; Actinobacteriota                                |

|                                                                                                               |
|---------------------------------------------------------------------------------------------------------------|
| Pajaroellobacter; Polyangiaceae; Polyangiales; Polyangia; Myxococcota                                         |
| MBNT15_ge; MBNT15_fa; MBNT15_or; MBNT15_cl; MBNT15                                                            |
| Lachnoclostridium; Lachnospiraceae; Lachnospirales; Clostridia; Firmicutes                                    |
| Nibribacter; Hymenobacteraceae; Cytophagales; Bacteroidia; Bacteroidota                                       |
| Skermanella; Azospirillaceae; Azospirillales; Alphaproteobacteria; Proteobacteria                             |
| Subgroup_11_ge; Subgroup_11_fa; Subgroup_11_or; Subgroup_11; Acidobacteriota                                  |
| UBA12409_ge; UBA12409; Babeliales; Babeliae; Dependientiae                                                    |
| Amb-16S-1323_ge; Amb-16S-1323; Rhizobiales; Alphaproteobacteria; Proteobacteria                               |
| Acetoanaerobium; Peptostreptococcaceae; Peptostreptococcales-Tissierellales; Clostridia; Firmicutes           |
| Haliangium; Haliangiaceae; Haliangiales; Polyangia; Myxococcota                                               |
| Belnapia; Acetobacteraceae; Acetobacterales; Alphaproteobacteria; Proteobacteria                              |
| Exiguobacterium; Exiguobacteraceae; Exiguobacteriales; Bacilli; Firmicutes                                    |
| Oscillospirales_unclassified; Oscillospirales_unclassified; Oscillospirales; Clostridia; Firmicutes           |
| Panacagrimonas; Solimonadaceae; Salinisphaerales; Gammaproteobacteria; Proteobacteria                         |
| NB1-j_ge; NB1-j_fa; NB1-j_or; NB1-j_cl; NB1-j                                                                 |
| Desulfovibrionaceae_unclassified; Desulfovibrionaceae; Desulfovibrionales; Desulfovibrionia; Desulfobacterota |
| Dermatophilaceae_unclassified; Dermatophilaceae; Micrococcales; Actinobacteria; Actinobacteriota              |
| Desulfobacca; Desulfobaccaceae; Desulfobaccales; Desulfobaccia; Desulfobacterota                              |
| Parabacteroides; Tannerellaceae; Bacteroidales; Bacteroidia; Bacteroidota                                     |
| Nocardiodaceae_unclassified; Nocardiodaceae; Propionibacteriales; Actinobacteria; Actinobacteriota            |
| PMMR1; Caulobacteraceae; Caulobacterales; Alphaproteobacteria; Proteobacteria                                 |
| MB-A2-108_ge; MB-A2-108_fa; MB-A2-108_or; MB-A2-108; Actinobacteriota                                         |
| Bergeyella; Weeksellaceae; Flavobacteriales; Bacteroidia; Bacteroidota                                        |
| Bacillales_unclassified; Bacillales_unclassified; Bacillales; Bacilli; Firmicutes                             |
| Simonsiella; Neisseriaceae; Burkholderiales; Gammaproteobacteria; Proteobacteria                              |
| Candidatus_Paracaedibacter; Paracaedibacteraceae; Paracaedibacteriales; Alphaproteobacteria; Proteobacteria   |
| Chlamydiaceae_unclassified; Chlamydiaceae; Chlamydiales; Chlamydiae; Verrucomicrobiota                        |
| Tannerella; Tannerellaceae; Bacteroidales; Bacteroidia; Bacteroidota                                          |
| Fusobacterium; Fusobacteriaceae; Fusobacteriales; Fusobacteriia; Fusobacteriota                               |
| TM7a; Saccharimonadaceae; Saccharimonadales; Saccharimonadia; Patescibacteria                                 |
| Halomonadaceae_ge; Halomonadaceae; Oceanospirillales; Gammaproteobacteria; Proteobacteria                     |
| Treponema; Spirochaetaceae; Spirochaetales; Spirochaetia; Spirochaetota                                       |
| Candidatus_Planktoluna; Microbacteriaceae; Micrococcales; Actinobacteria; Actinobacteriota                    |
| Rufibacter; Hymenobacteraceae; Cytophagales; Bacteroidia; Bacteroidota                                        |
| Staphylococcales_unclassified; Staphylococcales_unclassified; Staphylococcales; Bacilli; Firmicutes           |
| Clostridium; Caloramatoraceae; Clostridiales; Clostridia; Firmicutes                                          |
| Defluviitaleaceae_UCG-011; Defluviitaleaceae; Lachnospirales; Clostridia; Firmicutes                          |
| Geodermatophilaceae_unclassified; Geodermatophilaceae; Frankiales; Actinobacteria; Actinobacteriota           |
| Dermacoccaceae_unclassified; Dermacoccaceae; Micrococcales; Actinobacteria; Actinobacteriota                  |
| Candidatus_Aquiluna; Microbacteriaceae; Micrococcales; Actinobacteria; Actinobacteriota                       |
| Sanguibacter; Sanguibacteraceae; Micrococcales; Actinobacteria; Actinobacteriota                              |
| Micromonosporaceae_unclassified; Micromonosporaceae; Micromonosporales; Actinobacteria; Actinobacteriota      |
| Allokutzneria; Pseudonocardiaceae; Pseudonocardiales; Actinobacteria; Actinobacteriota                        |
| Paludibacteraceae_unclassified; Paludibacteraceae; Bacteroidales; Bacteroidia; Bacteroidota                   |
| Algoriphagus; Cyclobacteriaceae; Cytophagales; Bacteroidia; Bacteroidota                                      |
| Adhaeribacter; Hymenobacteraceae; Cytophagales; Bacteroidia; Bacteroidota                                     |
| Pseudarcicella; Spirosomaceae; Cytophagales; Bacteroidia; Bacteroidota                                        |
| Fluviicola; Crocinitomicaceae; Flavobacteriales; Bacteroidia; Bacteroidota                                    |
| Weeksellaceae_ge; Weeksellaceae; Flavobacteriales; Bacteroidia; Bacteroidota                                  |
| Babeliales_unclassified; Babeliales_unclassified; Babeliales; Babeliae; Dependientiae                         |

|                                                                                                                                              |
|----------------------------------------------------------------------------------------------------------------------------------------------|
| uncultured; Planococcaceae; Bacillales; Bacilli; Firmicutes                                                                                  |
| Enterococcaceae_unclassified; Enterococcaceae; Lactobacillales; Bacilli; Firmicutes                                                          |
| Clostridia_unclassified; Clostridia_unclassified; Clostridia_unclassified; Clostridia; Firmicutes                                            |
| Lactonifactor; Lachnospiraceae; Lachnospirales; Clostridia; Firmicutes                                                                       |
| Fusobacteriaceae_ge; Fusobacteriaceae; Fusobacteriales; Fusobacteriia; Fusobacteriota                                                        |
| Fusobacteriales_unclassified; Fusobacteriales_unclassified; Fusobacteriales; Fusobacteriia; Fusobacteriota                                   |
| Saccharimonadaceae_unclassified; Saccharimonadaceae; Saccharimonadales; Saccharimonadia; Patescibacteria                                     |
| Caulobacter; Caulobacteraceae; Caulobacterales; Alphaproteobacteria; Proteobacteria                                                          |
| Hirschia; Hyphomonadaceae; Caulobacterales; Alphaproteobacteria; Proteobacteria                                                              |
| Paramesorhizobium; Rhizobiaceae; Rhizobiales; Alphaproteobacteria; Proteobacteria                                                            |
| Polymorphum; Stappiaceae; Rhizobiales; Alphaproteobacteria; Proteobacteria                                                                   |
| Tardiphaga; Xanthobacteraceae; Rhizobiales; Alphaproteobacteria; Proteobacteria                                                              |
| Verticiella; Alcaligenaceae; Burkholderiales; Gammaproteobacteria; Proteobacteria                                                            |
| Rhodocyclaceae_unclassified; Rhodocyclaceae; Burkholderiales; Gammaproteobacteria; Proteobacteria                                            |
| Enterobacterales_ge; Enterobacterales_fa; Enterobacterales; Gammaproteobacteria; Proteobacteria                                              |
| Pseudoxanthomonas; Xanthomonadaceae; Xanthomonadales; Gammaproteobacteria; Proteobacteria                                                    |
| Unique taxa in the fall samples                                                                                                              |
| Ralstonia; Burkholderiaceae; Burkholderiales; Gammaproteobacteria; Proteobacteria                                                            |
| Sediminibacterium; Chitinophagaceae; Chitinophagales; Bacteroidia; Bacteroidota                                                              |
| Asinibacterium; Chitinophagaceae; Chitinophagales; Bacteroidia; Bacteroidota                                                                 |
| uncultured_ge; uncultured; Frankiales; Actinobacteria; Actinobacteriota                                                                      |
| Chloroplast_ge; Chloroplast_fa; Chloroplast; Cyanobacteriia; Cyanobacteria                                                                   |
| Klenkia; Geodermatophilaceae; Frankiales; Actinobacteria; Actinobacteriota                                                                   |
| Chitinophagaceae_unclassified; Chitinophagaceae; Chitinophagales; Bacteroidia; Bacteroidota                                                  |
| Candidatus_Ovatusbacter; Unknown_Family; Gammaproteobacteria_Incertae_Sedis; Gammaproteobacteria; Proteobacteria                             |
| Clostridiales_unclassified; Clostridiales_unclassified; Clostridiales; Clostridia; Firmicutes                                                |
| Nocardiaceae_unclassified; Nocardiaceae; Corynebacteriales; Actinobacteria; Actinobacteriota                                                 |
| Wolinella; Helicobacteraceae; Campylobacterales; Campylobacteria; Campilobacterota                                                           |
| Trabulsiella; Enterobacteriaceae; Enterobacterales; Gammaproteobacteria; Proteobacteria                                                      |
| Sarcina; Clostridiaceae; Clostridiales; Clostridia; Firmicutes                                                                               |
| Rickettsia; Rickettsiaceae; Rickettsiales; Alphaproteobacteria; Proteobacteria                                                               |
| Sphingosaurantiacus; Sphingomonadaceae; Sphingomonadales; Alphaproteobacteria; Proteobacteria                                                |
| Cellvibrio; Cellvibrionaceae; Cellvibrionales; Gammaproteobacteria; Proteobacteria                                                           |
| Aeromicrobium; Nocardiodaceae; Propionibacteriales; Actinobacteria; Actinobacteriota                                                         |
| Pedobacter; Sphingobacteriaceae; Sphingobacteriales; Bacteroidia; Bacteroidota                                                               |
| Paenibacillaceae_unclassified; Paenibacillaceae; Paenibacillales; Bacilli; Firmicutes                                                        |
| Methylophilaceae_unclassified; Methylophilaceae; Burkholderiales; Gammaproteobacteria; Proteobacteria                                        |
| Subgroup_22_ge; Subgroup_22_fa; Subgroup_22_or; Subgroup_22; Acidobacteriota                                                                 |
| Acidimicrobiia_unclassified; Acidimicrobiia_unclassified; Acidimicrobiia_unclassified; Acidimicrobiia; Actinobacteriota                      |
| CL500-29_marine_group; Ilumatobacteraceae; Microtrichales; Acidimicrobiia; Actinobacteriota                                                  |
| Actinotalea; Cellulomonadaceae; Micrococcales; Actinobacteria; Actinobacteriota                                                              |
| Crossiella; Pseudonocardiaceae; Pseudonocardiales; Actinobacteria; Actinobacteriota                                                          |
| Streptomycetaceae_unclassified; Streptomycetaceae; Streptomycetales; Actinobacteria; Actinobacteriota                                        |
| H3.93_ge; H3.93_fa; H3.93; Dehalococcoidia; Chloroflexi                                                                                      |
| Thermus; Thermaceae; Thermales; Deinococci; Deinococcota                                                                                     |
| Desulfobacterota_unclassified; Desulfobacterota_unclassified; Desulfobacterota_unclassified; Desulfobacterota_unclassified; Desulfobacterota |

|                                                                                                                             |
|-----------------------------------------------------------------------------------------------------------------------------|
| Desulfovibrionales_unclassified; Desulfovibrionales_unclassified; Desulfovibrionales; Desulfovibrionia;<br>Desulfobacterota |
| Rhodovarius; Acetobacteraceae; Acetobacterales; Alphaproteobacteria; Proteobacteria                                         |
| Rhodoplanes; Xanthobacteraceae; Rhizobiales; Alphaproteobacteria; Proteobacteria                                            |
| uncultured_ge; uncultured_fa; uncultured; Alphaproteobacteria; Proteobacteria                                               |
| Azomonas; Pseudomonadaceae; Pseudomonadales; Gammaproteobacteria; Proteobacteria                                            |
| <b>Unique taxa in the winter samples</b>                                                                                    |
| env.OPS_17_ge; env.OPS_17; Sphingobacteriales; Bacteroidia; Bacteroidota                                                    |
| Anaerovoracaceae_ge; Anaerovoracaceae; Peptostreptococcales-Tissierellales; Clostridia; Firmicutes                          |
| Rhodobacter; Rhodobacteraceae; Rhodobacterales; Alphaproteobacteria; Proteobacteria                                         |
| Modestobacter; Geodermatophilaceae; Frankiales; Actinobacteria; Actinobacteriota                                            |
| Diaphorobacter; Comamonadaceae; Burkholderiales; Gammaproteobacteria; Proteobacteria                                        |
| Frankiales_unclassified; Frankiales_unclassified; Frankiales; Actinobacteria; Actinobacteriota                              |
| TRA3-20_ge; TRA3-20; Burkholderiales; Gammaproteobacteria; Proteobacteria                                                   |
| Propionivibrio; Rhodocyclaceae; Burkholderiales; Gammaproteobacteria; Proteobacteria                                        |
| Galbitalea; Microbacteriaceae; Micrococcales; Actinobacteria; Actinobacteriota                                              |
| Dyadobacter; Spirosomaceae; Cytophagales; Bacteroidia; Bacteroidota                                                         |
| Methylobacter; Methylocomonadaceae; Methylococcales; Gammaproteobacteria; Proteobacteria                                    |
| DNF00809; Eggerthellaceae; Coriobacteriales; Coriobacteriia; Actinobacteriota                                               |
| Polaromonas; Comamonadaceae; Burkholderiales; Gammaproteobacteria; Proteobacteria                                           |
| FFCH16263_ge; FFCH16263_fa; FFCH16263; Actinobacteria; Actinobacteriota                                                     |
| KD4-96_ge; KD4-96_fa; KD4-96_or; KD4-96; Chloroflexi                                                                        |
| Aminobacter; Rhizobiaceae; Rhizobiales; Alphaproteobacteria; Proteobacteria                                                 |
| MND1; Nitrosomonadaceae; Burkholderiales; Gammaproteobacteria; Proteobacteria                                               |
| Brevinema; Brevinemataceae; Brevinematales; Brevinematia; Spirochaetota                                                     |
| Sporichthyaceae_ge; Sporichthyaceae; Frankiales; Actinobacteria; Actinobacteriota                                           |
| Amaricoccus; Rhodobacteraceae; Rhodobacterales; Alphaproteobacteria; Proteobacteria                                         |
| Rosenbergiella; Erwiniaceae; Enterobacterales; Gammaproteobacteria; Proteobacteria                                          |
| Oceanospirillales_unclassified; Oceanospirillales_unclassified; Oceanospirillales; Gammaproteobacteria;<br>Proteobacteria   |
| Mycobacteriaceae_unclassified; Mycobacteriaceae; Corynebacteriales; Actinobacteria; Actinobacteriota                        |
| Dysgonomonadaceae_unclassified; Dysgonomonadaceae; Bacteroidales; Bacteroidia; Bacteroidota                                 |
| Prevotellaceae_unclassified; Prevotellaceae; Bacteroidales; Bacteroidia; Bacteroidota                                       |
| Sphingobacteriaceae_unclassified; Sphingobacteriaceae; Sphingobacteriales; Bacteroidia; Bacteroidota                        |
| Sphingobacteriales_unclassified; Sphingobacteriales_unclassified; Sphingobacteriales; Bacteroidia; Bacteroidota             |
| Paraliobacillus; Bacillaceae; Bacillales; Bacilli; Firmicutes                                                               |
| Clostridium_sensu_stricto_2; Clostridiaceae; Clostridiales; Clostridia; Firmicutes                                          |
| Nitrospira; Nitrospiraceae; Nitrospirales; Nitrospira; Nitrospirota                                                         |
| TM7; S32; Saccharimonadales; Saccharimonadia; Patescibacteria                                                               |
| Pedomicrobium; Hyphomicrobiaceae; Rhizobiales; Alphaproteobacteria; Proteobacteria                                          |
| KF-JG30-B3_ge; KF-JG30-B3; Rhizobiales; Alphaproteobacteria; Proteobacteria                                                 |
| Aeromonadales_unclassified; Aeromonadales_unclassified; Aeromonadales; Gammaproteobacteria; Proteobacteria                  |
| Robbsia; Burkholderiaceae; Burkholderiales; Gammaproteobacteria; Proteobacteria                                             |
| Malikia; Comamonadaceae; Burkholderiales; Gammaproteobacteria; Proteobacteria                                               |
| Diplorickettsiaceae_unclassified; Diplorickettsiaceae; Diplorickettsiales; Gammaproteobacteria; Proteobacteria              |
| Siccibacter; Erwiniaceae; Enterobacterales; Gammaproteobacteria; Proteobacteria                                             |
| Tatumella; Erwiniaceae; Enterobacterales; Gammaproteobacteria; Proteobacteria                                               |

**Table S5.** List of the unique taxa found within samples from each individual. Taxa are presented in decreasing relative abundance in the samples.

| <b>Unique taxa in the samples from fish #5</b>                                                                |
|---------------------------------------------------------------------------------------------------------------|
| Microvirga; Beijerinckiaceae; Rhizobiales; Alphaproteobacteria; Proteobacteria                                |
| Turicella; Corynebacteriaceae; Corynebacteriales; Actinobacteria; Actinobacteriota                            |
| Iamia; Iamiaceae; Microtrichales; Acidimicrobiia; Actinobacteriota                                            |
| Thermoactinomyces; Thermoactinomycetaceae; Thermoactinomycetales; Bacilli; Firmicutes                         |
| Xanthobacter; Xanthobacteraceae; Rhizobiales; Alphaproteobacteria; Proteobacteria                             |
| Tepidimonas; Comamonadaceae; Burkholderiales; Gammaproteobacteria; Proteobacteria                             |
| Atopobium; Atopobiaceae; Coriobacteriales; Coriobacteriia; Actinobacteriota                                   |
| Conexibacter; Solirubrobacteraceae; Solirubrobacteriales; Thermoleophilia; Actinobacteriota                   |
| Cereibacter; Rhodobacteraceae; Rhodobacterales; Alphaproteobacteria; Proteobacteria                           |
| Rickettsiella; Diplorickettsiaceae; Diplorickettsiales; Gammaproteobacteria; Proteobacteria                   |
| uncultured; Diplorickettsiaceae; Diplorickettsiales; Gammaproteobacteria; Proteobacteria                      |
| Pectobacteriaceae_unclassified; Pectobacteriaceae; Enterobacterales; Gammaproteobacteria; Proteobacteria      |
| <b>Unique taxa in the samples from fish #23</b>                                                               |
| Bacteroidales_unclassified; Bacteroidales_unclassified; Bacteroidales; Bacteroidia; Bacteroidota              |
| Longimicrobium; Longimicrobiaceae; Longimicrobiales; Longimicrobia; Gemmatimonadota                           |
| Plesiomonas; Enterobacteriaceae; Enterobacterales; Gammaproteobacteria; Proteobacteria                        |
| uncultured; Desulfovibrionaceae; Desulfovibrionales; Desulfovibrionia; Desulfobacterota                       |
| Larkinella; Spirosomaceae; Cytophagales; Bacteroidia; Bacteroidota                                            |
| Rubellimicrobium; Rhodobacteraceae; Rhodobacterales; Alphaproteobacteria; Proteobacteria                      |
| Marmoricola; Nocardiodaceae; Propionibacteriales; Actinobacteria; Actinobacteriota                            |
| Blastococcus; Geodermatophilaceae; Frankiales; Actinobacteria; Actinobacteriota                               |
| Pajaroellobacter; Polyangiaceae; Polyangiales; Polyangia; Myxococcota                                         |
| Lachnoclostridium; Lachnospiraceae; Lachnospirales; Clostridia; Firmicutes                                    |
| Nibribacter; Hymenobacteraceae; Cytophagales; Bacteroidia; Bacteroidota                                       |
| Skermanella; Azospirillaceae; Azospirillales; Alphaproteobacteria; Proteobacteria                             |
| Belnapia; Acetobacteraceae; Acetobacterales; Alphaproteobacteria; Proteobacteria                              |
| Exiguobacterium; Exiguobacteraceae; Exiguobacterales; Bacilli; Firmicutes                                     |
| Desulfovibrionaceae_unclassified; Desulfovibrionaceae; Desulfovibrionales; Desulfovibrionia; Desulfobacterota |
| Parabacteroides; Tannerellaceae; Bacteroidales; Bacteroidia; Bacteroidota                                     |
| Nocardiodaceae_unclassified; Nocardiodaceae; Propionibacteriales; Actinobacteria; Actinobacteriota            |
| PMMR1; Caulobacteraceae; Caulobacterales; Alphaproteobacteria; Proteobacteria                                 |
| Simonsiella; Neisseriaceae; Burkholderiales; Gammaproteobacteria; Proteobacteria                              |
| Candidatus_Paracaedibacter; Paracaedibacteraceae; Paracaedibacteriales; Alphaproteobacteria; Proteobacteria   |
| Chlamydiaceae_unclassified; Chlamydiaceae; Chlamydiales; Chlamydiae; Verrucomicrobiota                        |
| Fusobacterium; Fusobacteriaceae; Fusobacteriales; Fusobacteriia; Fusobacteriota                               |
| Treponema; Spirochaetaceae; Spirochaetales; Spirochaetia; Spirochaetota                                       |
| Candidatus_Planktoluna; Microbacteriaceae; Micrococcales; Actinobacteria; Actinobacteriota                    |
| Rufibacter; Hymenobacteraceae; Cytophagales; Bacteroidia; Bacteroidota                                        |
| Clostridium; Caloramatoraceae; Clostridiales; Clostridia; Firmicutes                                          |
| Geodermatophilaceae_unclassified; Geodermatophilaceae; Frankiales; Actinobacteria; Actinobacteriota           |
| Candidatus_Aquiluna; Microbacteriaceae; Micrococcales; Actinobacteria; Actinobacteriota                       |
| Paludibacteraceae_unclassified; Paludibacteraceae; Bacteroidales; Bacteroidia; Bacteroidota                   |
| Adhaeribacter; Hymenobacteraceae; Cytophagales; Bacteroidia; Bacteroidota                                     |
| Pseudarcicella; Spirosomaceae; Cytophagales; Bacteroidia; Bacteroidota                                        |
| Fluviicola; Crocinitomicaceae; Flavobacteriales; Bacteroidia; Bacteroidota                                    |
| Clostridia_unclassified; Clostridia_unclassified; Clostridia_unclassified; Clostridia; Firmicutes             |
| Lactonifactor; Lachnospiraceae; Lachnospirales; Clostridia; Firmicutes                                        |



|                                                                                                            |
|------------------------------------------------------------------------------------------------------------|
| Fusobacteriaceae_ge; Fusobacteriaceae; Fusobacteriales; Fusobacteriia; Fusobacteriota                      |
| Fusobacteriales_unclassified; Fusobacteriales_unclassified; Fusobacteriales; Fusobacteriia; Fusobacteriota |
| Tardiphaga; Xanthobacteraceae; Rhizobiales; Alphaproteobacteria; Proteobacteria                            |
| Verticiella; Alcaligenaceae; Burkholderiales; Gammaproteobacteria; Proteobacteria                          |
| <b>Unique taxa in the samples from fish #28</b>                                                            |
| uncultured; Ruminococcaceae; Oscillospirales; Clostridia; Firmicutes                                       |
| Dietzia; Dietziaceae; Corynebacteriales; Actinobacteria; Actinobacteriota                                  |
| Gemella; Gemellaceae; Staphylococcales; Bacilli; Firmicutes                                                |
| Mesorhizobium; Rhizobiaceae; Rhizobiales; Alphaproteobacteria; Proteobacteria                              |
| Saccharopolyspora; Pseudonocardiaceae; Pseudonocardiales; Actinobacteria; Actinobacteriota                 |
| Ruminococcus; Ruminococcaceae; Oscillospirales; Clostridia; Firmicutes                                     |
| Anaerostipes; Lachnospiraceae; Lachnospirales; Clostridia; Firmicutes                                      |
| Acetoanaerobium; Peptostreptococcaceae; Peptostreptococcales-Tissierellales; Clostridia; Firmicutes        |
| Haliangium; Haliangiaceae; Haliangiales; Polyangia; Myxococcota                                            |
| Panacagrimonas; Solimonadaceae; Salinisphaerales; Gammaproteobacteria; Proteobacteria                      |
| TM7a; Saccharimonadaceae; Saccharimonadales; Saccharimonadia; Patescibacteria                              |
| Halomonadaceae_ge; Halomonadaceae; Oceanospirillales; Gammaproteobacteria; Proteobacteria                  |
| Staphylococcales_unclassified; Staphylococcales_unclassified; Staphylococcales; Bacilli; Firmicutes        |
| Defluviitaleaceae_UCG-011; Defluviitaleaceae; Lachnospirales; Clostridia; Firmicutes                       |
| Dermacoccaceae_unclassified; Dermacoccaceae; Micrococcales; Actinobacteria; Actinobacteriota               |
| Micromonosporaceae_unclassified; Micromonosporaceae; Micromonosporales; Actinobacteria; Actinobacteriota   |
| Allokutzneria; Pseudonocardiaceae; Pseudonocardiales; Actinobacteria; Actinobacteriota                     |
| Algoriphagus; Cyclobacteriaceae; Cytophagales; Bacteroidia; Bacteroidota                                   |
| Saccharimonadaceae_unclassified; Saccharimonadaceae; Saccharimonadales; Saccharimonadia; Patescibacteria   |
| Caulobacter; Caulobacteraceae; Caulobacteriales; Alphaproteobacteria; Proteobacteria                       |
| Rhodocyclaceae_unclassified; Rhodocyclaceae; Burkholderiales; Gammaproteobacteria; Proteobacteria          |
| Enterobacterales_ge; Enterobacterales_fa; Enterobacterales; Gammaproteobacteria; Proteobacteria            |
| Pseudoxanthomonas; Xanthomonadaceae; Xanthomonadales; Gammaproteobacteria; Proteobacteria                  |
| <b>Unique taxa in the samples from fish #33</b>                                                            |
| Pannonibacter; Stappiaceae; Rhizobiales; Alphaproteobacteria; Proteobacteria                               |
| Lactococcus; Streptococcaceae; Lactobacillales; Bacilli; Firmicutes                                        |
| Subgroup_11_ge; Subgroup_11_fa; Subgroup_11_or; Subgroup_11; Acidobacteriota                               |
| UBA12409_ge; UBA12409; Babeliales; Babeliae; Dependientiae                                                 |
| Amb-16S-1323_ge; Amb-16S-1323; Rhizobiales; Alphaproteobacteria; Proteobacteria                            |
| NB1-j_ge; NB1-j_fa; NB1-j_or; NB1-j_cl; NB1-j                                                              |
| Desulfobacca; Desulfobaccaceae; Desulfobaccales; Desulfobaccia; Desulfobacterota                           |
| Bergeyella; Weeksellaceae; Flavobacteriales; Bacteroidia; Bacteroidota                                     |
| Tannerella; Tannerellaceae; Bacteroidales; Bacteroidia; Bacteroidota                                       |
| Sanguibacter; Sanguibacteraceae; Micrococcales; Actinobacteria; Actinobacteriota                           |
| Weeksellaceae_ge; Weeksellaceae; Flavobacteriales; Bacteroidia; Bacteroidota                               |
| Babeliales_unclassified; Babeliales_unclassified; Babeliales; Babeliae; Dependientiae                      |
| uncultured; Planococcaceae; Bacillales; Bacilli; Firmicutes                                                |
| Enterococcaceae_unclassified; Enterococcaceae; Lactobacillales; Bacilli; Firmicutes                        |
| Hirschia; Hyphomonadaceae; Caulobacteriales; Alphaproteobacteria; Proteobacteria                           |
| Paramesrhizobium; Rhizobiaceae; Rhizobiales; Alphaproteobacteria; Proteobacteria                           |
| Polymorphum; Stappiaceae; Rhizobiales; Alphaproteobacteria; Proteobacteria                                 |
| <b>Unique taxa in the samples from fish #44</b>                                                            |
| uncultured_ge; uncultured; Frankiales; Actinobacteria; Actinobacteriota                                    |
| Chloroplast_ge; Chloroplast_fa; Chloroplast; Cyanobacteriia; Cyanobacteria                                 |
| Nocardiaceae_unclassified; Nocardiaceae; Corynebacteriales; Actinobacteria; Actinobacteriota               |

|                                                                                                                                              |
|----------------------------------------------------------------------------------------------------------------------------------------------|
| Wolinella; Helicobacteraceae; Campylobacterales; Campylobacteria; Campilobacterota                                                           |
| Cellvibrio; Cellvibrionaceae; Cellvibrionales; Gammaproteobacteria; Proteobacteria                                                           |
| Subgroup_22_ge; Subgroup_22_fa; Subgroup_22_or; Subgroup_22; Acidobacteriota                                                                 |
| CL500-29_marine_group; Ilumatobacteraceae; Microtrichales; Acidimicrobiia; Actinobacteriota                                                  |
| Streptomycetaceae_unclassified; Streptomycetaceae; Streptomycetales; Actinobacteria; Actinobacteriota                                        |
| Rhodovarius; Acetobacteraceae; Acetobacterales; Alphaproteobacteria; Proteobacteria                                                          |
| <b>Unique taxa in the samples from fish #49</b>                                                                                              |
| Ralstonia; Burkholderiaceae; Burkholderiales; Gammaproteobacteria; Proteobacteria                                                            |
| Asinibacterium; Chitinophagaceae; Chitinophagales; Bacteroidia; Bacteroidota                                                                 |
| Chitinophagaceae_unclassified; Chitinophagaceae; Chitinophagales; Bacteroidia; Bacteroidota                                                  |
| Candidatus_Ovatusbacter; Unknown_Family; Gammaproteobacteria_Incertae_Sedis; Gammaproteobacteria; Proteobacteria                             |
| Trabulsiella; Enterobacteriaceae; Enterobacteriales; Gammaproteobacteria; Proteobacteria                                                     |
| Aeromicrobium; Nocardiodaceae; Propionibacteriales; Actinobacteria; Actinobacteriota                                                         |
| Pedobacter; Sphingobacteriaceae; Sphingobacteriales; Bacteroidia; Bacteroidota                                                               |
| Acidimicrobiia_unclassified; Acidimicrobiia_unclassified; Acidimicrobiia_unclassified; Acidimicrobiia; Actinobacteriota                      |
| Crossiella; Pseudonocardaceae; Pseudonocardiales; Actinobacteria; Actinobacteriota                                                           |
| Thermus; Thermaceae; Thermales; Deinococci; Deinococcota                                                                                     |
| Desulfobacterota_unclassified; Desulfobacterota_unclassified; Desulfobacterota_unclassified; Desulfobacterota_unclassified; Desulfobacterota |
| <b>Unique taxa in the samples from fish #57</b>                                                                                              |
| Rickettsia; Rickettsiaceae; Rickettsiales; Alphaproteobacteria; Proteobacteria                                                               |
| Sphingosaurantiacus; Sphingomonadaceae; Sphingomonadales; Alphaproteobacteria; Proteobacteria                                                |
| Methylophilaceae_unclassified; Methylophilaceae; Burkholderiales; Gammaproteobacteria; Proteobacteria                                        |
| Actinotalea; Cellulomonadaceae; Micrococcales; Actinobacteria; Actinobacteriota                                                              |
| H3.93_ge; H3.93_fa; H3.93; Dehalococcoidia; Chloroflexi                                                                                      |
| Desulfovibrionales_unclassified; Desulfovibrionales_unclassified; Desulfovibrionales; Desulfovibrionia; Desulfobacterota                     |
| Rhodoplanes; Xanthobacteraceae; Rhizobiales; Alphaproteobacteria; Proteobacteria                                                             |
| uncultured_ge; uncultured_fa; uncultured; Alphaproteobacteria; Proteobacteria                                                                |
| Azomonas; Pseudomonadaceae; Pseudomonadales; Gammaproteobacteria; Proteobacteria                                                             |
| <b>Unique taxa in the samples from fish #67</b>                                                                                              |
| Rhodobacter; Rhodobacteraceae; Rhodobacteriales; Alphaproteobacteria; Proteobacteria                                                         |
| Diaphorobacter; Comamonadaceae; Burkholderiales; Gammaproteobacteria; Proteobacteria                                                         |
| FFCH16263_ge; FFCH16263_fa; FFCH16263; Actinobacteria; Actinobacteriota                                                                      |
| KD4-96_ge; KD4-96_fa; KD4-96_or; KD4-96; Chloroflexi                                                                                         |
| Sporichthyaceae_ge; Sporichthyaceae; Frankiales; Actinobacteria; Actinobacteriota                                                            |
| Mycobacteriaceae_unclassified; Mycobacteriaceae; Corynebacteriales; Actinobacteria; Actinobacteriota                                         |
| Dysgonomonadaceae_unclassified; Dysgonomonadaceae; Bacteroidales; Bacteroidia; Bacteroidota                                                  |
| Paraliobacillus; Bacillaceae; Bacillales; Bacilli; Firmicutes                                                                                |
| Clostridium_sensu_stricto_2; Clostridiaceae; Clostridiales; Clostridia; Firmicutes                                                           |
| Nitrospira; Nitrospiraceae; Nitrospirales; Nitrospira; Nitrospirota                                                                          |
| Pedomicrobium; Hyphomicrobiaceae; Rhizobiales; Alphaproteobacteria; Proteobacteria                                                           |
| KF-JG30-B3_ge; KF-JG30-B3; Rhizobiales; Alphaproteobacteria; Proteobacteria                                                                  |
| <b>Unique taxa in the samples from fish #68</b>                                                                                              |
| Anaerovoracaceae_ge; Anaerovoracaceae; Peptostreptococcales-Tissierellales; Clostridia; Firmicutes                                           |
| Modestobacter; Geodermatophilaceae; Frankiales; Actinobacteria; Actinobacteriota                                                             |
| Methylobacter; Methylomonadaceae; Methylococcales; Gammaproteobacteria; Proteobacteria                                                       |
| Brevinema; Brevinemataceae; Brevinematales; Brevinematia; Spirochaetota                                                                      |

|                                                                                                                        |
|------------------------------------------------------------------------------------------------------------------------|
| Amaricoccus; Rhodobacteraceae; Rhodobacterales; Alphaproteobacteria; Proteobacteria                                    |
| Sphingobacteriales_unclassified; Sphingobacteriales_unclassified; Sphingobacteriales; Bacteroidia; Bacteroidota        |
| TM7; S32; Saccharimonadales; Saccharimonadia; Patescibacteria                                                          |
| Malikia; Comamonadaceae; Burkholderiales; Gammaproteobacteria; Proteobacteria                                          |
| <b>Unique taxa in the samples from fish #69</b>                                                                        |
| Frankiales_unclassified; Frankiales_unclassified; Frankiales; Actinobacteria; Actinobacteriota                         |
| TRA3-20_ge; TRA3-20; Burkholderiales; Gammaproteobacteria; Proteobacteria                                              |
| Propionivibrio; Rhodocyclaceae; Burkholderiales; Gammaproteobacteria; Proteobacteria                                   |
| Galbitalea; Microbacteriaceae; Micrococcales; Actinobacteria; Actinobacteriota                                         |
| Dyadobacter; Spirosomaceae; Cytophagales; Bacteroidia; Bacteroidota                                                    |
| DNF00809; Eggerthellaceae; Coriobacteriales; Coriobacteriia; Actinobacteriota                                          |
| Polaromonas; Comamonadaceae; Burkholderiales; Gammaproteobacteria; Proteobacteria                                      |
| Aminobacter; Rhizobiaceae; Rhizobiales; Alphaproteobacteria; Proteobacteria                                            |
| Rosenbergiella; Erwiniaceae; Enterobacterales; Gammaproteobacteria; Proteobacteria                                     |
| Oceanospirillales_unclassified; Oceanospirillales_unclassified; Oceanospirillales; Gammaproteobacteria; Proteobacteria |
| Prevotellaceae_unclassified; Prevotellaceae; Bacteroidales; Bacteroidia; Bacteroidota                                  |
| Sphingobacteriaceae_unclassified; Sphingobacteriaceae; Sphingobacteriales; Bacteroidia; Bacteroidota                   |
| Aeromonadales_unclassified; Aeromonadales_unclassified; Aeromonadales; Gammaproteobacteria; Proteobacteria             |
| Robbsia; Burkholderiaceae; Burkholderiales; Gammaproteobacteria; Proteobacteria                                        |
| Diplorickettsiaceae_unclassified; Diplorickettsiaceae; Diplorickettsiales; Gammaproteobacteria; Proteobacteria         |
| Siccibacter; Erwiniaceae; Enterobacterales; Gammaproteobacteria; Proteobacteria                                        |
| Tatumella; Erwiniaceae; Enterobacterales; Gammaproteobacteria; Proteobacteria                                          |
